# Supplementary material for: Enhanced photocatalytic hydrogen production of MoS2 sheet/carbon nanofiber using rapid electron transport of Mo6+ and carbon nanofiber
Source: Royal Society of Chemistry journal article supplement (doi:10.1039/d1ra06938a), 2021-01-01
Supplement: d1ra06938a1.pdf [file d1ra06938a1.pdf]

## Enhanced photocatalytic hydrogen production of MoS<sub>2</sub> sheet/carbon nanofiber by quickly electron transport of Mo<sup>6+</sup> and carbon nanofiber

Jianfeng Qiu <sup>a,b</sup>, jiaqi Pan <sup>a,c</sup>, Shunhang Wei <sup>b</sup>, Qifeng Liang <sup>b</sup>, Yawei Wang <sup>d</sup>, Rong Wu <sup>e</sup>, Chaorong Li <sup>\*a,c</sup>

a. College of Textile Science and Engineering, Zhejiang Sci-Tech University, Hangzhou, 310018, PR China. E-mail address: crli@zstu.edu.cn (C. Li).

b. Department of Physics, Shaoxing University, Shaoxing 312000, PR China

c. Key Laboratory of Optical Field Manipulation of Zhejiang Province, Department of Physics, Zhejiang Sci-Tech University, Hangzhou 310018, P. R. China

d. School of Chemistry and Chemical Engineering, Jiujiang University, Jiujiang 332005, PR China

e. School of Physics Science and Technology, Xinjiang University, Urumqi 830000, PR China

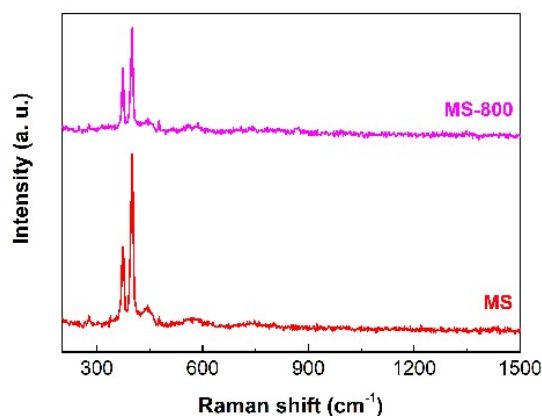

Fig. S1 Raman spectra of MS and MS-800 samples

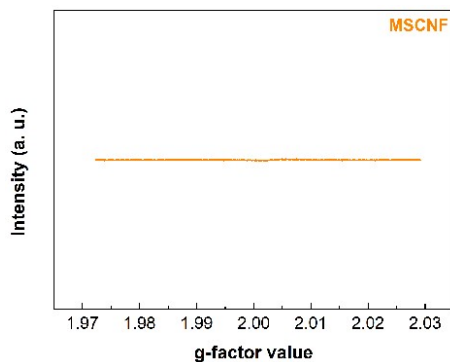

Fig. S2 EPR patterns of MSCNF

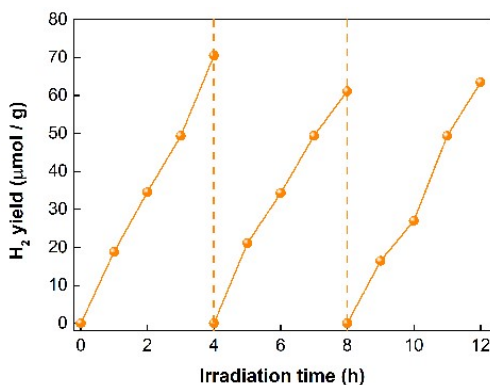

Fig.S3 The cycle curve of the MSCNF sample
